# Supplementary material for: Clinical characteristics and risk factors for severity of COVID-19 outside Wuhan: a double-center retrospective cohort study of 213 cases in Hunan, China
Source: PubMed Central journal article supplement — Ther Adv Respir Dis. 2020 Nov 2;14:1753466620963035. doi: 10.1177/1753466620963035 (PMC7649871; doi:10.1177/1753466620963035), 2020-11-02
Supplement: Author_Response_2.pdf [file Author_Response_2.pdf]

## Author Response 2

1. Previously, owing to our discussion was too long, we compressed words as far as possible. Now, as requests of reviewer 2, we added some new detailed contents, which were marked with red color in discussion paragraph of “Older age and comorbidities were poor predictors of COVID-19”.

In addition, in order to more roundly reflect the meaning of age, we added Supplementary table, in which the age was calculated as categorical variable (>50 years vs. <50 years), the age >50 years increased risk of severe /critical admission 2.27 times (P=0.025) and ICU admission 3.75 times (P=0.01). Previously, the OR value of age were calculated as continuous variable, for example OR=1.03, which meant the odds of risk increased 1.03 times when age added 1 year.

At the same time, in order to elaborate the meaning of comorbidities, we added the total incidence of comorbidities in Adjusted Table 1(marked with red color in the line of “Comorbidities”).

2. In discussion of “Older age and comorbidities were poor predictors of COVID-19” paragraph, the 'older animals' was right. This reference<sup>20</sup> was a molecular mechanism study in macaques why older animals had more inflammation responses to viral infection than younger animals. In order to more clearly express, we replaced the last word “adults” with “animals”, and added “molecular mechanism” in the front of this sentence.

In addition, we updated some references (3,4,5,6,11,13,14,15,16,17,22,23,24), which were published ahead of print when our study finished. Now, all of above articles were formally published, we added their numbers of volumes, issues and pages with red color.
