# Supplementary material for: Clinical characteristics and risk factors for severity of COVID-19 outside Wuhan: a double-center retrospective cohort study of 213 cases in Hunan, China
Source: PubMed Central journal article supplement — Ther Adv Respir Dis. 2020 Nov 2;14:1753466620963035. doi: 10.1177/1753466620963035 (PMC7649871; doi:10.1177/1753466620963035), 2020-11-02
Supplement: Reviewer_1_v.1.pdf [file Reviewer_1_v.1.pdf]

Reviewer 1 v.1

Comments to the Author

I read the report titled "Clinical characteristics and Risk factors of Severity in Coronavirus Disease 2019 (COVID-19) outside of Wuhan - a double-center retrospective cohort study of 213 cases in Hunan, China" with great interest. It shows the actual data of many patients and is worthy of publication in the journal Therapeutic Advances in Respiratory Disease in view of the current world situation.

It may not make sense statistically because there are too many p-values. However, it is not necessary to show the statistical significance in this report, rather, I believe that the authors have provided realistic data.
