# Supplementary material for: Clinical characteristics and risk factors for severity of COVID-19 outside Wuhan: a double-center retrospective cohort study of 213 cases in Hunan, China
Source: PubMed Central journal article supplement — Ther Adv Respir Dis. 2020 Nov 2;14:1753466620963035. doi: 10.1177/1753466620963035 (PMC7649871; doi:10.1177/1753466620963035), 2020-11-02
Supplement: Reviewer_2_v.1.pdf [file Reviewer_2_v.1.pdf]

Reviewer 2 v.1

Comments to the Author

1. Authors are advised to make grammatical corrections throughout the manuscript and use a language editing service if possible. I have highlighted and underlined the areas where there are grammatical/ language errors that may be rectified.
2. Authors mention about investigating clinical characteristics and identifying risk factors in COVID 19 pneumonia patients outside of Wuhan, they are requested to specify the country, China in the abstract.
3. Do the authors mean 'COPD' rather than CPOD in abstract?
4. Can the authors please elaborate if the risk factors described are clinical predictors of severity.
5. Authors have given the pathophysiological reasoning for clinical laboratory findings in the discussion.
6. Authors have included limitations of their study.
7. In the discussion, the reasoning for milder severity in outside Wuhan is unclear, and mortality aspect in both places need more clarification.
