# Supplementary material for: Clinical characteristics and risk factors for severity of COVID-19 outside Wuhan: a double-center retrospective cohort study of 213 cases in Hunan, China
Source: PubMed Central journal article supplement — Ther Adv Respir Dis. 2020 Nov 2;14:1753466620963035. doi: 10.1177/1753466620963035 (PMC7649871; doi:10.1177/1753466620963035), 2020-11-02
Supplement: Reviewer_2_v.2.pdf [file Reviewer_2_v.2.pdf]

Reviewer 2 v.2

Confidential Comments to the Editor

1. Can the authors elaborate on their statement where they mention older age and comorbidities were poor predictors of COVID-19 mentioned in last paragraph on page 13 of 39?
2. On first line of page 14 of 39, did the authors mean 'older adults' rather the 'older animals' mentioned there? The authors are recommended to change that as necessary.
